# Supplementary material for: Nucleophilic Substitution at Heteroatoms—Identity Substitution Reactions at Phosphorus and Sulfur Centers: Do They Proceed in a Concerted (SN2) or Stepwise (A–E) Way?
Source: MDPI journal article supplement (doi:10.3390/molecules27030599), 2022-01-18
Supplement: s1 [file s1]

**Nucleophilic Substitution at Heteroatoms. Identity Substitution Reactions  
at Phosphorus and Sulfur Centres: Do They Proceed in a Concerted (S<sub>N</sub>2)  
or Stepwise (A-E) Way?**

Marian Mikołajczyk, Marek Cypryk, Bartłomiej Gostyński, Jakub Kowalczewski

**Supplementary Information**

Tables S1-S7. B3LYP-GD3/Def2TZVP geometries of species engaged in the identity methoxy exchange reaction in methyl ethylphenylphosphinate (in Cartesian coordinates).

- Table S1 – geometry of PhEtP(O)(OMe) in acetone

| Element | X [Å]     | Y [Å]     | Z [Å]     |
|---------|-----------|-----------|-----------|
| P       | 1.146728  | 0.062031  | 0.495412  |
| O       | 1.486493  | -0.305928 | 1.892113  |
| O       | 1.597113  | 1.581429  | 0.224989  |
| C       | 1.995736  | -0.933294 | -0.755309 |
| H       | 1.770213  | -0.538519 | -1.748082 |
| H       | 3.061026  | -0.758394 | -0.582447 |
| C       | 1.662884  | -2.426359 | -0.674981 |
| H       | 2.232183  | -2.978318 | -1.423522 |
| H       | 1.910498  | -2.832180 | 0.306335  |
| H       | 0.602990  | -2.607799 | -0.859476 |
| C       | 1.323592  | 2.315498  | -0.981417 |
| H       | 1.706623  | 3.320486  | -0.823211 |
| H       | 1.832051  | 1.866741  | -1.836148 |
| H       | 0.250711  | 2.361472  | -1.172726 |
| C       | -0.631478 | -0.020508 | 0.166610  |
| C       | -1.505109 | 0.013308  | 1.257467  |
| C       | -1.156150 | -0.101673 | -1.127175 |
| C       | -2.879507 | -0.025433 | 1.057701  |
| H       | -1.1620   | 0.060371  | 2.2617    |
| C       | -2.531501 | -0.142921 | -1.324587 |
| H       | -0.501825 | -0.138616 | -1.988252 |
| C       | -3.393788 | -0.102782 | -0.233394 |
| H       | -3.548556 | -0.20     | 1.908253  |
| H       | -2.928562 | -0.208257 | -2.329314 |
| H       | -4.464583 | -0.136461 | -0.388919 |

- Table S2 – geometry of methoxyl ion( $\text{CH}_3\text{O}^-$ ) in acetone

| Element | X [Å]     | Y [Å]    | Z [Å]     |
|---------|-----------|----------|-----------|
| O       | -0.802775 | 0.27     | -0.20     |
| C       | 0.552779  | -0.87    | 0.06      |
| H       | 1.035380  | 0.362832 | -0.950478 |
| H       | 1.035097  | 0.642205 | 0.789322  |
| H       | 1.035051  | -1.4733  | 0.161279  |

- Table S3 – geometry of **PC** in acetone

| Element | X [Å]     | Y [Å]     | Z [Å]     |
|---------|-----------|-----------|-----------|
| P       | -1.118595 | -0.366955 | 0.309601  |
| O       | -1.512365 | -0.350638 | 1.745552  |
| O       | 0.126270  | 3.348597  | 0.504580  |
| C       | -1.614670 | 1.064833  | -0.649046 |
| H       | -1.270181 | 0.909153  | -1.674283 |
| H       | -1.039164 | 1.910470  | -0.220457 |
| C       | -3.1270   | 1.344419  | -0.603814 |
| H       | -3.344611 | 2.254134  | -1.163634 |
| H       | -3.460717 | 1.494026  | 0.422171  |
| H       | -3.703378 | 0.530373  | -1.037934 |
| C       | 1.140324  | 3.228498  | -0.398296 |
| H       | 1.334145  | 4.146306  | -1.012616 |
| H       | 0.987650  | 2.421435  | -1.160854 |
| H       | 2.139559  | 2.984710  | 0.046421  |
| C       | 0.668342  | -0.573951 | 0.102952  |
| C       | 1.515441  | -0.385818 | 1.195547  |
| C       | 1.214669  | -0.892943 | -1.143270 |
| C       | 2.892344  | -0.507650 | 1.043926  |
| H       | 1.089905  | -0.140425 | 2.159644  |
| C       | 2.590129  | -1.017627 | -1.293659 |
| H       | 0.564923  | -1.049083 | -1.995484 |
| C       | 3.430130  | -0.822896 | -0.2020   |
| H       | 3.544581  | -0.357562 | 1.894908  |
| H       | 3.7261    | -1.266417 | -2.261209 |
| H       | 4.502224  | -0.917773 | -0.318186 |
| C       | -1.634302 | -2.930343 | -0.072692 |
| H       | -2.047152 | -3.034569 | 0.931349  |
| H       | -0.585072 | -3.233749 | -0.070617 |
| H       | -2.191041 | -3.557213 | -0.765258 |
| O       | -1.769410 | -1.576536 | -0.538601 |

- Table S4 – geometry of **RC** in acetone

| Element | X [Å]     | Y [Å]     | Z [Å]    |
|---------|-----------|-----------|----------|
| P       | 1.118595  | -0.366955 | 0.309601 |
| O       | 1.512365  | -0.350638 | 1.745552 |
| O       | -0.126270 | 3.348597  | 0.504580 |

|   |           |           |           |
|---|-----------|-----------|-----------|
| C | 1.614670  | 1.064833  | -0.649046 |
| H | 1.270181  | 0.909153  | -1.674283 |
| H | 1.039164  | 1.910470  | -0.220457 |
| C | 3.1270    | 1.344419  | -0.603814 |
| H | 3.344611  | 2.254134  | -1.163634 |
| H | 3.460717  | 1.494026  | 0.422171  |
| H | 3.703378  | 0.530373  | -1.037934 |
| C | -1.140324 | 3.228498  | -0.398296 |
| H | -1.334145 | 4.146306  | -1.012616 |
| H | -0.987650 | 2.421435  | -1.160854 |
| H | -2.139559 | 2.984710  | 0.046421  |
| C | -0.668342 | -0.573951 | 0.102952  |
| C | -1.515441 | -0.385818 | 1.195547  |
| C | -1.214669 | -0.892943 | -1.143270 |
| C | -2.892344 | -0.507650 | 1.043926  |
| H | -1.089905 | -0.140425 | 2.159644  |
| C | -2.590129 | -1.017627 | -1.293659 |
| H | -0.564923 | -1.049083 | -1.995484 |
| C | -3.430130 | -0.822896 | -0.2020   |
| H | -3.544581 | -0.357562 | 1.894908  |
| H | -3.7261   | -1.266417 | -2.261209 |
| H | -4.502224 | -0.917773 | -0.318186 |
| C | 1.634302  | -2.930343 | -0.072692 |
| H | 2.047152  | -3.034569 | 0.931349  |
| H | 0.585072  | -3.233749 | -0.070617 |
| H | 2.191041  | -3.557213 | -0.765258 |
| O | 1.769410  | -1.576536 | -0.538601 |

- Table S5 - geometry of **TBI-1** in acetone

| Element | X [Å]     | Y [Å]     | Z [Å]     |
|---------|-----------|-----------|-----------|
| P       | -0.961237 | 0.092559  | -0.4567   |
| O       | -1.422655 | -0.114274 | -1.874181 |
| O       | -0.647801 | 1.891093  | -0.765706 |
| C       | -2.129602 | 0.594854  | 0.899579  |
| H       | -1.511229 | 0.880958  | 1.755598  |
| H       | -2.578819 | 1.519324  | 0.537103  |
| C       | -3.230751 | -0.365408 | 1.346510  |
| H       | -3.912599 | 0.149228  | 2.030551  |
| H       | -3.818392 | -0.718599 | 0.497058  |

|   |           |           |           |
|---|-----------|-----------|-----------|
| H | -2.8288   | -1.239787 | 1.852038  |
| C | -0.171945 | 2.785738  | 0.202439  |
| H | 0.244792  | 3.670860  | -0.294919 |
| H | -0.962041 | 3.138770  | 0.884178  |
| H | 0.627111  | 2.363504  | 0.830142  |
| C | 0.834460  | -0.035417 | -0.034866 |
| C | 1.786714  | 0.1564    | -1.036638 |
| C | 1.278539  | -0.338989 | 1.252738  |
| C | 3.146289  | 0.037389  | -0.764125 |
| H | 1.458250  | 0.403231  | -2.038046 |
| C | 2.638364  | -0.432303 | 1.537932  |
| H | 0.557201  | -0.515049 | 2.040588  |
| C | 3.578489  | -0.250246 | 0.528021  |
| H | 3.869557  | 0.174756  | -1.559304 |
| H | 2.963034  | -0.654911 | 2.547502  |
| H | 4.636412  | -0.333208 | 0.744803  |
| C | -0.604701 | -2.635929 | -0.649871 |
| H | -1.015756 | -2.653076 | -1.666153 |
| H | 0.490899  | -2.575676 | -0.737176 |
| H | -0.845357 | -3.587167 | -0.162808 |
| O | -1.143498 | -1.5930   | 0.114829  |

- Table S6 - geometry of **TS1** in acetone

| Element | X [Å]     | Y [Å]     | Z [Å]     |
|---------|-----------|-----------|-----------|
| P       | -1.5703   | -0.186188 | -0.396693 |
| O       | -1.361622 | -0.352208 | -1.836097 |
| O       | -0.168144 | 2.126828  | -1.015041 |
| C       | -2.039840 | 0.906248  | 0.630738  |
| H       | -1.426865 | 1.254166  | 1.4645    |
| H       | -2.209537 | 1.775082  | 0.0174    |
| C       | -3.354381 | 0.305371  | 1.134516  |
| H       | -3.938437 | 1.078592  | 1.639145  |
| H       | -3.958715 | -0.081513 | 0.311617  |
| H       | -3.186940 | -0.510523 | 1.835753  |
| C       | 0.283019  | 3.0596    | -0.065961 |
| H       | -0.516731 | 3.416927  | 0.595170  |
| H       | 1.023534  | 2.556871  | 0.641580  |
| H       | 0.793756  | 3.895283  | -0.489780 |

|   |           |           |           |
|---|-----------|-----------|-----------|
| C | 0.768097  | -0.169821 | -0.031620 |
| C | 1.682488  | -0.408386 | -1.060794 |
| C | 1.242471  | -0.036214 | 1.274207  |
| C | 3.041847  | -0.494506 | -0.792108 |
| H | 1.317962  | -0.518135 | -2.073568 |
| C | 2.607422  | -0.1147   | 1.543529  |
| H | 0.550807  | 0.118975  | 2.092667  |
| C | 3.511280  | -0.343481 | 0.513098  |
| H | 3.739360  | -0.680215 | -1.599986 |
| H | 2.960866  | -0.0199   | 2.561090  |
| H | 4.571852  | -0.408644 | 0.722026  |
| C | -0.893624 | -2.831361 | -0.075389 |
| H | -1.152660 | -2.984202 | -1.125740 |
| H | 0.193990  | -2.886996 | 0.032198  |
| H | -1.349230 | -3.618378 | 0.525093  |
| O | -1.397753 | -1.586713 | 0.4844    |

- Table S7 –geometry of TS2 in acetone

| Element | X [Å]     | Y [Å]     | Z [Å]     |
|---------|-----------|-----------|-----------|
| P       | 1.5703    | -0.186188 | -0.396693 |
| O       | 1.361622  | -0.352208 | -1.836097 |
| O       | 0.168144  | 2.126828  | -1.015041 |
| C       | 2.039840  | 0.906248  | 0.630738  |
| H       | 1.426865  | 1.254166  | 1.4645    |
| H       | 2.209537  | 1.775082  | 0.0174    |
| C       | 3.354381  | 0.305371  | 1.134516  |
| H       | 3.938437  | 1.078592  | 1.639145  |
| H       | 3.958715  | -0.081513 | 0.311617  |
| H       | 3.186940  | -0.510523 | 1.835753  |
| C       | -0.283019 | 3.0596    | -0.065961 |
| H       | 0.516731  | 3.416927  | 0.595170  |
| H       | -1.023534 | 2.556871  | 0.641580  |
| H       | -0.793756 | 3.895283  | -0.489780 |
| C       | -0.768097 | -0.169821 | -0.031620 |
| C       | -1.682488 | -0.408386 | -1.060794 |
| C       | -1.242471 | -0.036214 | 1.274207  |
| C       | -3.041847 | -0.494506 | -0.792108 |
| H       | -1.317962 | -0.518135 | -2.073568 |

|   |           |           |           |
|---|-----------|-----------|-----------|
| C | -2.607422 | -0.1147   | 1.543529  |
| H | -0.550807 | 0.118975  | 2.092667  |
| C | -3.511280 | -0.343481 | 0.513098  |
| H | -3.739360 | -0.680215 | -1.599986 |
| H | -2.960866 | -0.0199   | 2.561090  |
| H | -4.571852 | -0.408644 | 0.722026  |
| C | 0.893624  | -2.831361 | -0.075389 |
| H | 1.152660  | -2.984202 | -1.125740 |
| H | -0.193990 | -2.886996 | 0.032198  |
| H | 1.349230  | -3.618378 | 0.525093  |
| O | 1.397753  | -1.586713 | 0.4844    |

- Table S8 – B3LYP-GD3/Def2TZVP calculated values of the thermodynamical potentials for the structures considered in tables S1-S7, with imaginary frequency values for transition states.

| structure                      | H [hartree] | G [hartree] | S [cal/mol·K] | Im. Freq [cm <sup>-1</sup> ] |
|--------------------------------|-------------|-------------|---------------|------------------------------|
| PhEtP(O)(OMe)                  | -842.697883 | -842.751830 | 113.541       | N/A                          |
| CH <sub>3</sub> O <sup>-</sup> | -115.221878 | -115.247991 | 54.957        | N/A                          |
| <b>PC</b>                      | -957.930152 | -957.995985 | 138.557       | N/A                          |
| <b>RC</b>                      | -957.930152 | -957.995985 | 138.557       | N/A                          |
| <b>TBI-1</b>                   | -957.926668 | -957.987741 | 128.540       | N/A                          |
| <b>TS1</b>                     | -957.924025 | -957.985001 | 128.335       | -55.55                       |
| <b>TS2</b>                     | -957.924025 | -957.985001 | 128.335       | -55.55                       |

Tables S9-S11. B3LYP-GD3/Def2TZVP geometries of species engaged in the identity chloride exchange reaction in (ethoxy)ethylphosphonochloridothionate (in Cartesian coordinates).

- Table S9 – geometry of EtP(S)(OEt)Cl in acetone

| Element | X [Å]     | Y [Å]     | Z [Å]     |
|---------|-----------|-----------|-----------|
| P       | 0.511368  | -0.091575 | 0.076126  |
| S       | 1.824834  | -0.048324 | 1.488037  |
| Cl      | 0.455411  | -1.895965 | -0.963163 |
| O       | -0.966834 | 0.062853  | 0.639345  |
| C       | 0.715010  | 1.098235  | -1.279703 |
| H       | -0.050556 | 0.877470  | -2.0264   |
| H       | 1.682463  | 0.874088  | -1.731260 |
| C       | -2.172257 | 0.088630  | -0.185971 |
| H       | -2.166910 | -0.786947 | -0.836235 |
| H       | -2.151136 | 0.989562  | -0.8760   |
| C       | -3.3622   | 0.082770  | 0.745156  |
| H       | -4.279079 | 0.1134    | 0.157438  |
| H       | -3.365374 | -0.819803 | 1.356695  |
| H       | -3.341551 | 0.954045  | 1.4401    |
| C       | 0.639197  | 2.550310  | -0.802361 |
| H       | 1.418979  | 2.766302  | -0.072380 |
| H       | 0.773192  | 3.217334  | -1.654339 |
| H       | -0.326779 | 2.773649  | -0.347756 |

- Table S10 – geometry of EL/LC in acetone

| Element | X [Å]     | Y [Å]     | Z [Å]     |
|---------|-----------|-----------|-----------|
| P       | 0.937160  | -0.129657 | 0.259255  |
| S       | 1.1188    | -0.080179 | 2.187039  |
| Cl      | -3.511514 | -0.923364 | 0.326058  |
| O       | 0.3193    | 1.163194  | -0.436426 |
| C       | 0.041960  | -1.557947 | -0.398874 |
| H       | -0.941744 | -1.498709 | 0.082671  |
| H       | 0.551477  | -2.442985 | -0.013884 |
| C       | -0.912556 | 1.777953  | 0.073020  |
| H       | -0.687015 | 2.214454  | 1.046530  |
| H       | -1.674127 | 1.4134    | 0.191081  |
| C       | -1.337362 | 2.822682  | -0.929336 |



|    |           |           |           |
|----|-----------|-----------|-----------|
| H  | -2.244559 | 3.313823  | -0.572531 |
| H  | -0.562268 | 3.579149  | -1.059546 |
| H  | -1.550964 | 2.366108  | -1.896561 |
| C  | -0.111977 | -1.593634 | -1.918055 |
| H  | 0.851587  | -1.674694 | -2.421093 |
| H  | -0.715620 | -2.458272 | -2.196789 |
| H  | -0.617899 | -0.699459 | -2.282322 |
| Cl | 2.746839  | -0.163442 | -0.751243 |

- Table S11 – geometry of **TS** in acetone

| Element | X [Å]     | Y [Å]     | Z [Å]     |
|---------|-----------|-----------|-----------|
| P       | 0.294415  | 0.109473  | -0.211249 |
| S       | 1.428837  | 0.498518  | -1.728123 |
| Cl      | -0.538456 | 2.501337  | 0.1668    |
| O       | -1.211675 | -0.283762 | -0.494429 |
| C       | 0.806623  | 0.123524  | 1.563606  |
| H       | 0.420429  | -0.796216 | 1.995050  |
| H       | 0.318875  | 0.974899  | 2.026656  |
| C       | -2.158421 | -0.576311 | 0.569696  |
| H       | -2.167911 | 0.267171  | 1.261830  |
| H       | -1.816071 | -1.473555 | 1.087973  |
| C       | -3.5188   | -0.782612 | -0.070240 |
| H       | -4.246041 | -1.012053 | 0.702299  |
| H       | -3.828108 | 0.1185    | -0.596484 |
| H       | -3.479413 | -1.612243 | -0.777412 |
| C       | 2.322767  | 0.206293  | 1.710864  |
| H       | 2.714270  | 1.127761  | 1.279719  |
| H       | 2.573967  | 0.193333  | 2.772923  |
| H       | 2.811827  | -0.639859 | 1.230132  |
| Cl      | 0.794261  | -2.402567 | -0.092546 |

- Table S12 – B3LYP-GD3/Def2TZVP calculated values of the thermodynamical potentials for the structures considered in tables S9-S11, with imaginary frequency values for transition states.

| structure       | H [hartree]  | G [hartree]  | S [cal/mol·K] | Im. Freq [cm <sup>-1</sup> ] |
|-----------------|--------------|--------------|---------------|------------------------------|
| EtP(S)(OEt)Cl   | -1433.557135 | -1433.607163 | 105.293       | N/A                          |
| Cl <sup>-</sup> | -460.398371  | -460.415754  | 36.586        | N/A                          |

|              |              |              |         |       |
|--------------|--------------|--------------|---------|-------|
| <b>EL/LC</b> | -1893.961314 | -1894.019311 | 122.065 | N/A   |
| <b>TS</b>    | -1893.935682 | -1893.991097 | 116.629 | -228. |

Tables S13-S18. B3LYP-GD3/Def2TZVP geometries of species engaged in the identity methoxy exchange at sulfinyl sulfur in methyl *p*-toluenesulfinate (in Cartesian coordinates).

- Table S13— geometry of TolS(O)(OMe) in acetone

| <b>Element</b> | <b>X [Å]</b> | <b>Y [Å]</b> | <b>Z [Å]</b> |
|----------------|--------------|--------------|--------------|
| C              | -0.642553    | -1.067435    | 0.577540     |
| C              | -0.019840    | 0.138182     | 0.260943     |
| C              | -0.754187    | 1.214454     | -0.213094    |
| C              | -2.125822    | 1.072805     | -0.397510    |
| C              | -2.773134    | -0.126943    | -0.101074    |
| C              | -2.9645      | -1.193170    | 0.390257     |
| H              | -0.065390    | -1.9619      | 0.958909     |
| H              | -0.254592    | 2.147298     | -0.438158    |
| H              | -2.699888    | 1.910857     | -0.7735      |
| H              | -2.496321    | -2.130907    | 0.630216     |
| C              | -4.255753    | -0.285677    | -0.299455    |
| H              | -4.465099    | -1.045881    | -1.0561      |
| H              | -4.740166    | -0.610451    | 0.623936     |
| H              | -4.719194    | 0.6471       | -0.619141    |
| S              | 1.739793     | 0.325415     | 0.562322     |
| O              | 2.102088     | 1.694223     | 0.139113     |
| O              | 2.160739     | -0.731816    | -0.639690    |
| C              | 3.552027     | -1.122717    | -0.621389    |
| H              | 3.840694     | -1.490617    | 0.365422     |
| H              | 3.643975     | -1.923084    | -1.351294    |
| H              | 4.190111     | -0.286581    | -0.910241    |

- Table S14— geometry of **4-H<sup>+</sup>** in acetone

| <b>Element</b> | <b>X [Å]</b> | <b>Y [Å]</b> | <b>Z [Å]</b> |
|----------------|--------------|--------------|--------------|
| C              | 0.545592     | -1.126171    | -0.072428    |
| C              | 0.041674     | 0.1735       | -0.168331    |
| C              | 0.885109     | 1.281991     | -0.197833    |
| C              | 2.251079     | 1.082062     | -0.090815    |
| C              | 2.789041     | -0.203114    | 0.027852     |
| C              | 1.916609     | -1.295562    | 0.032415     |
| H              | -0.113643    | -1.981025    | -0.070433    |

|   |           |           |           |
|---|-----------|-----------|-----------|
| H | 0.489693  | 2.283691  | -0.296091 |
| H | 2.909944  | 1.940535  | -0.103899 |
| H | 2.315286  | -2.298251 | 0.117248  |
| C | 4.269869  | -0.403540 | 0.171111  |
| H | 4.549334  | -0.381010 | 1.228202  |
| H | 4.581339  | -1.367593 | -0.230413 |
| H | 4.828470  | 0.385077  | -0.332723 |
| S | -1.684415 | 0.448217  | -0.417609 |
| O | -1.986132 | 1.707176  | 0.504260  |
| O | -2.234267 | -0.830829 | 0.327842  |
| C | -3.619687 | -1.237278 | 0.031946  |
| H | -3.780262 | -1.254683 | -1.043575 |
| H | -3.695406 | -2.235044 | 0.449923  |
| H | -4.303510 | -0.554092 | 0.528203  |
| H | -1.543127 | 1.669609  | 1.374984  |

- Table S15– geometry of **4-OMe** in acetone

| Element | X [Å]     | Y [Å]     | Z [Å]     |
|---------|-----------|-----------|-----------|
| S       | 1.697696  | 0.014311  | -0.283247 |
| O       | 1.799556  | -1.668892 | -0.635088 |
| C       | 1.305741  | -2.689294 | 0.237459  |
| H       | 1.314010  | -3.620355 | -0.329791 |
| H       | 1.944255  | -2.792586 | 1.115925  |
| H       | 0.282507  | -2.481623 | 0.561220  |
| C       | -0.093492 | 0.2947    | -0.1037   |
| C       | -0.852256 | -0.417572 | -1.187054 |
| C       | -0.706875 | 0.422804  | 1.070521  |
| C       | -2.239682 | -0.409741 | -1.092907 |
| H       | -0.369728 | -0.760256 | -2.092523 |
| C       | -2.090790 | 0.405755  | 1.157033  |
| H       | -0.109695 | 0.759187  | 1.905704  |
| C       | -2.880777 | -0.2627   | 0.077153  |
| H       | -2.829010 | -0.734026 | -1.941874 |
| H       | -2.567480 | 0.718304  | 2.078440  |
| C       | -4.381813 | 0.023458  | 0.174556  |
| H       | -4.842535 | -0.603921 | -0.588409 |
| H       | -4.720131 | -0.317755 | 1.154156  |
| H       | -4.757319 | 1.041481  | 0.038776  |
| O       | 2.289466  | -0.254251 | 1.217378  |

|   |          |          |           |
|---|----------|----------|-----------|
| H | 2.417253 | 0.632405 | 1.598375  |
| O | 1.749892 | 1.804777 | 0.266095  |
| C | 1.366585 | 2.679990 | -0.766615 |
| H | 0.278537 | 2.824373 | -0.794613 |
| H | 1.843657 | 3.650690 | -0.609732 |
| H | 1.681390 | 2.307725 | -1.753622 |

- Table S16– geometry of CF<sub>3</sub>COOH in acetone

| Element | X [Å]     | Y [Å]     | Z [Å]     |
|---------|-----------|-----------|-----------|
| C       | -0.595641 | -0.1578   | 0.29      |
| C       | 1.519763  | -1.039498 | 0.86      |
| O       | -1.1576   | -0.678181 | 1.086267  |
| O       | -1.1305   | -0.676210 | -1.087557 |
| F       | -1.187971 | 1.191628  | 0.1055    |
| F       | 0.950129  | 0.157606  | 0.0135    |
| F       | 1.493087  | 1.223469  | 0.64      |
| H       | 2.487935  | -0.943060 | -0.68     |

- Table S17– geometry of CF<sub>3</sub>COO<sup>−</sup> in acetone

| Element | X [Å]     | Y [Å]     | Z [Å]     |
|---------|-----------|-----------|-----------|
| C       | -0.526120 | 0.013739  | -0.1712   |
| C       | 1.049671  | 0.012315  | -0.4676   |
| O       | 1.590771  | 1.128730  | -0.2454   |
| O       | 1.532390  | -1.133273 | -0.2414   |
| F       | -1.015995 | -0.573899 | 1.120454  |
| F       | -1.029618 | -0.682630 | -1.051695 |
| F       | -1.079565 | 1.243197  | -0.060173 |

- Table S18– geometry of MeOH in acetone

| Element | X [Å]     | Y [Å]     | Z [Å]    |
|---------|-----------|-----------|----------|
| C       | -0.669370 | 0.019642  | 0.00     |
| H       | -1.026652 | 0.547242  | -0.89023 |
| H       | -1.090184 | -0.985392 | -0.0366  |
| H       | -1.026589 | 0.546513  | 0.890653 |
| O       | 0.751826  | -0.122877 | -0.14    |
| H       | 1.145032  | 0.756797  | 0.58     |

- Table S19 – B3LYP-GD3/Def2TZVP calculated values of the thermodynamical potentials for the structures considered in tables S13-S18, with imaginary frequency values for transition states.

| <b>structure</b>                 | <b>H [hartree]</b> | <b>G [hartree]</b> | <b>S [cal/mol·K]</b> | <b>Im. Freq [cm<sup>-1</sup>]</b> |
|----------------------------------|--------------------|--------------------|----------------------|-----------------------------------|
| TolS(O)(OMe)                     | -859.541098        | -859.594965        | 113.371              | N/A                               |
| <b>4-H<sup>+</sup></b>           | -859.939516        | -859.992490        | 111.493              | N/A                               |
| <b>4-OMe</b>                     | -975.226724        | -975.286583        | 125.985              | N/A                               |
| CF <sub>3</sub> COOH             | -526.998371        | -527.036904        | 81.100               | N/A                               |
| CF <sub>3</sub> COO <sup>-</sup> | -526.564902        | -526.603773        | 81.810               | N/A                               |
| MeOH                             | -115.727304        | -115.754388        | 57.200               | N/A                               |
